# Supplementary material for: Evidence that growth hormone can improve mitochondrial function in oocytes from aged mice
Source: PubMed Central journal article supplement (PMC6420407; doi:10.1530/rep-18-0529), 2019-01-21
Supplement: supplementary_table_1.pdf [file supplementary_table_1.pdf]

**Supplemental Table 1 Effect of rhGH on different classes of ovarian follicles in each group (average number per slide)**

| Treated groups   | Preantral follicles    | Antral follicles        | Atretic follicles      |
|------------------|------------------------|-------------------------|------------------------|
| <b>Young</b>     |                        |                         |                        |
| Wt               | 7.60±2.07              | 8.60±0.55               | 5.00±1.41              |
| Saline group     | 7.20±2.17              | 8.40±1.34               | 4.40±1.95              |
| Low-dose/ rhGH   | 6.80±1.64              | 8.20±2.59               | 4.80±1.48              |
| Medium-dose/rhGH | 8.00±1.73              | 8.00±1.58               | 4.20±1.30              |
| High-dose/rhGH   | 7.20±1.48              | 8.60±1.52               | 4.00±1.00              |
| Total            | 7.36±1.73              | 8.36±1.52               | 4.48±1.39              |
| <b>Aged</b>      |                        |                         |                        |
| Wt               | 1.60±0.89 <sup>a</sup> | 1.40±0.55 <sup>a</sup>  | 1.40±0.54 <sup>a</sup> |
| Saline group     | 2.00±1.00 <sup>a</sup> | 1.80±0.84 <sup>a</sup>  | 1.60±0.55 <sup>a</sup> |
| Low-dose/ rhGH   | 1.80±0.84 <sup>a</sup> | 2.00±1.00 <sup>a</sup>  | 1.20±0.45 <sup>a</sup> |
| Medium-dose/rhGH | 2.20±1.09 <sup>a</sup> | 4.00±1.00 <sup>ab</sup> | 1.40±0.55 <sup>a</sup> |
| High-dose/rhGH   | 2.40±1.67 <sup>a</sup> | 4.60±1.14 <sup>ab</sup> | 1.20±0.44 <sup>a</sup> |
| Total            | 2.00±1.08 <sup>a</sup> | 2.76±1.56 <sup>a</sup>  | 1.36±0.49 <sup>a</sup> |

Note: Preantral follicles include primordial follicle, primary follicle and secondary follicle. Antral follicles include tertiary follicle and mature follicle. Data expressed as Mean ±SD of 5 random ovarian slides from five females in each group. a, b significantly different from control groups (a: compared with wt/young group; b: compared with wt/aged group), respectively at  $P < 0.05$  using one-way ANOVA followed by Tukey-Kramer as a post-hoc test.
