# Supplementary material for: Evidence that growth hormone can improve mitochondrial function in oocytes from aged mice
Source: PubMed Central journal article supplement (PMC6420407; doi:10.1530/rep-18-0529), 2019-01-21
Supplement: supplementary_table_2.pdf [file supplementary_table_2.pdf]

**Supplemental Table 2 Serum AMH level and collected MII oocytes in different groups (Mean  $\pm$  SD)**

| Groups           | Mice number | AMH(ng/ml)                   | Oocytes                         | MIIOocytes                     | MIIOocyte rate (%) |
|------------------|-------------|------------------------------|---------------------------------|--------------------------------|--------------------|
| <b>Young</b>     |             |                              |                                 |                                |                    |
| Wt               | 28          | 15.95 $\pm$ 3.02             | 24.18 $\pm$ 7.68                | 14.36 $\pm$ 7.62               | 58.43              |
| Saline group     | 29          | 15.52 $\pm$ 3.15             | 25.00 $\pm$ 8.58                | 15.46 $\pm$ 8.65               | 60.36              |
| Low-dose/ rhGH   | 25          | 16.14 $\pm$ 3.95             | 21.36 $\pm$ 6.71                | 13.76 $\pm$ 8.77               | 61.09              |
| Medium-dose/rhGH | 27          | 14.84 $\pm$ 3.69             | 22.52 $\pm$ 7.26                | 13.07 $\pm$ 5.53               | 58.40              |
| High-dose/rhGH   | 23          | 14.86 $\pm$ 3.55             | 25.39 $\pm$ 6.78                | 16.91 $\pm$ 8.82               | 64.32              |
| Total            | 132         | 15.46 $\pm$ 3.39             | 23.69 $\pm$ 7.62                | 14.48 $\pm$ 8.37               | 59.11              |
| <b>Aged</b>      |             |                              |                                 |                                |                    |
| Wt               | 26          | 5.47 $\pm$ 2.92              | 11.36 $\pm$ 5.78 <sup>a</sup>   | 5.13 $\pm$ 4.22 <sup>a</sup>   | 43.26 <sup>a</sup> |
| Saline group     | 26          | 5.11 $\pm$ 2.12 <sup>a</sup> | 11.58 $\pm$ 5.26 <sup>a</sup>   | 5.29 $\pm$ 3.73 <sup>a</sup>   | 44.17 <sup>a</sup> |
| Low-dose/ rhGH   | 29          | 5.37 $\pm$ 2.02 <sup>a</sup> | 10.69 $\pm$ 4.44 <sup>a</sup>   | 4.59 $\pm$ 3.07 <sup>a</sup>   | 42.52 <sup>a</sup> |
| Medium-dose/rhGH | 24          | 4.53 $\pm$ 1.83 <sup>a</sup> | 14.63 $\pm$ 6.23 <sup>abc</sup> | 7.83 $\pm$ 5.27 <sup>abc</sup> | 52.51 <sup>b</sup> |
| High-dose/rhGH   | 25          | 4.87 $\pm$ 1.44 <sup>a</sup> | 15.28 $\pm$ 6.52 <sup>abc</sup> | 7.76 $\pm$ 4.16 <sup>abc</sup> | 49.49 <sup>b</sup> |
| Total            | 130         | 5.11 $\pm$ 2.12 <sup>d</sup> | 12.65 $\pm$ 5.78 <sup>d</sup>   | 6.08 $\pm$ 4.19 <sup>d</sup>   | 46.39 <sup>d</sup> |

Note: Different superscript letters within columns represent significant differences with groups ( $P < 0.05$ , <sup>a</sup>compared with wt/young group, <sup>b</sup>compared with wt/old group, <sup>c</sup>compared with aged Low-dose group, <sup>d</sup>compared with total outcomes of the young group).
