# Supplementary material for: Evidence that growth hormone can improve mitochondrial function in oocytes from aged mice
Source: PubMed Central journal article supplement (PMC6420407; doi:10.1530/rep-18-0529), 2019-01-21
Supplement: supplementary_table_3.pdf [file supplementary_table_3.pdf]

**Supplemental Table 3 Distribution of mitochondria**

| Oocytes          | Homogeneous%(n)          | Heterogeneous%(n)        | Peripheral%(n)           |
|------------------|--------------------------|--------------------------|--------------------------|
| <b>Young</b>     |                          |                          |                          |
| Wt               | 58.8(40/68)              | 35.3(24/68)              | 5.9(4/68)                |
| Saline group     | 58.3(35/60)              | 35.0(21/60)              | 6.7(4/60)                |
| Low-dose/ rhGH   | 53.3(48/90)              | 36.7(33/90)              | 10.0(9/90)               |
| Medium-dose/rhGH | 51.3(40/78)              | 35.9(28/78)              | 12.8(10/78)              |
| High-dose/rhGH   | 60.0(48/80)              | 25.0(20/80)              | 15.0(12/80)              |
| <b>Aged</b>      |                          |                          |                          |
| Wt               | 41.7(30/72) <sup>a</sup> | 38.9(28/72) <sup>a</sup> | 19.4(14/72) <sup>a</sup> |
| Saline group     | 35.1(20/57) <sup>a</sup> | 31.6(18/57) <sup>a</sup> | 33.3(9/57) <sup>a</sup>  |
| Low-dose/ rhGH   | 62.5(35/56) <sup>b</sup> | 25.0(14/56) <sup>b</sup> | 12.5(7/56) <sup>b</sup>  |
| Medium-dose/rhGH | 66.7(32/48) <sup>b</sup> | 29.2(14/48) <sup>b</sup> | 4.1(2/48) <sup>b</sup>   |
| High-dose/rhGH   | 62.1(36/58) <sup>b</sup> | 31.0(18/58) <sup>b</sup> | 6.9(4/58) <sup>b</sup>   |

Note: Different superscript letters (a,b) within columns represent significant differences with groups ( $P < 0.05$ , <sup>a</sup>compared with wt/young group, <sup>b</sup>compared with wt/old group).
