# Supplementary material for: Evidence that growth hormone can improve mitochondrial function in oocytes from aged mice
Source: PubMed Central journal article supplement (PMC6420407; doi:10.1530/rep-18-0529), 2019-01-21
Supplement: supplementary_table_4.pdf [file supplementary_table_4.pdf]

**Supplemental Table 4 The mtDNA characteristics in the experimental groups (Mean)**

| Groups           | Number of analyzed oocyte | Mean mtDNA copy number $\pm$ SD | Range                |
|------------------|---------------------------|---------------------------------|----------------------|
| <b>Young</b>     |                           |                                 |                      |
| Wt               | 130                       | 200 213 $\pm$ 139 367           | 29 985-537 664       |
| Saline group     | 138                       | 207 567 $\pm$ 141 173           | 28 750-479 553       |
| Low-dose/ rhGH   | 126                       | 158 013 $\pm$ 124 895           | 38 956-418 850       |
| Medium-dose/rhGH | 119                       | 191 681 $\pm$ 124 964           | 70 346-499 637       |
| High-dose/rhGH   | 129                       | 144 516 $\pm$ 119 223           | 28 843-387 051       |
| Total            | 642                       | 181 330 $\pm$ 127 268           | 28 750-537 664       |
| <b>Aged</b>      |                           |                                 |                      |
| Wt               | 63                        | 180 197 $\pm$ 136 017           | 38 711 $\pm$ 498 440 |
| Saline group     | 60                        | 175 789 $\pm$ 115 665           | 54 866 $\pm$ 438 847 |
| Low-dose/ rhGH   | 73                        | 156 583 $\pm$ 137 261           | 50 223 $\pm$ 399 456 |
| Medium-dose/rhGH | 75                        | 197 073 $\pm$ 140 483           | 59 866 $\pm$ 488 563 |
| High-dose/rhGH   | 67                        | 144 781 $\pm$ 111 270           | 66 933 $\pm$ 387 480 |
| Total            | 338                       | 175 434 $\pm$ 123 305           | 38 711 $\pm$ 498 440 |

Note: In aged and young groups, no significant difference was observed in rhGH treatment groups compared the control.
